# Supplementary material for: Facultative crassulacean acid metabolism in a C3–C4 intermediate
Source: PubMed Central journal article supplement — J Exp Bot. 2019 Mar 1;70(22):6571–9. doi: 10.1093/jxb/erz085 (PMC6883265; doi:10.1093/jxb/erz085), 2019-03-01

## Supplementary Figure Legends

**Supplementary Figure S1. Fourteen days of net CO<sub>2</sub> exchange of *Portulaca cryptopetala* during a wet-dry-wet cycle.** Gas exchange was measured for the shoot (leaves plus stem) of a plant growing in a pot. Watering was withheld on day 5 (red arrow) and recommenced on day 13 (blue arrow). During the light periods of day 1, 3, 4, and 6, the shoot was exposed to air containing 2 % O<sub>2</sub> (black arrows) for 44 to 56 min. Shaded areas represent 12 h dark periods. PFD incident on the top of the gas-exchange cuvette was 1000  $\mu\text{mol m}^{-2} \text{s}^{-1}$ . At the end of the experiment, total leaf area was 23.7 cm<sup>2</sup>, and leaf and stem dry masses were 0.1063 and 0.0433 g, respectively.

**Supplementary Figure S2. Eleven days of net CO<sub>2</sub> exchange of *Portulaca molokiniensis* during a wet-dry-wet cycle.** Gas exchange was measured for the shoot (leaves plus stem) of a plant growing in a pot. Watering was withheld on day 2 (red arrow) and recommenced on day 10 (blue arrow). During the light periods of day 1, 2, 3, and 4, the shoot was exposed to air containing 2 % O<sub>2</sub> for 61 to 92 min. Shaded areas represent 12 h dark periods. PFD incident on the top of the gas-exchange cuvette was 1000  $\mu\text{mol m}^{-2} \text{s}^{-1}$ . At the end of the experiment, total leaf area was 78.7 cm<sup>2</sup>, and leaf and stem dry masses were 0.383 and 0.0327 g.

**Supplementary Figure S3. Sixteen days of net CO<sub>2</sub> exchange of *Portulaca molokiniensis* during a wet-dry-wet cycle.** Gas exchange was measured for the shoot (leaves plus stem) of a plant growing in a pot. Watering was withheld on day 3 (red arrow) and recommenced on day 14 (blue arrow). Shaded areas represent 12 h dark periods. PFD incident on the top of the gas-exchange cuvette was 1000  $\mu\text{mol m}^{-2} \text{s}^{-1}$ . At the end of the experiment, total leaf area was 36.1 cm<sup>2</sup>, and leaf and stem dry masses were 0.195 and 0.0165 g.

**Supplementary Figure S4. Twelve days of net CO<sub>2</sub> exchange of *Portulaca molokiniensis* during a wet-dry-wet cycle.** Gas exchange was measured for the shoot (leaves plus stem) of a plant growing in a pot. Watering was withheld on day 2 (red arrow) and recommenced on day 11

(blue arrow). Shaded areas represent 12 h dark periods. PFD incident on the top of the gas-exchange cuvette was  $1000 \mu\text{mol m}^{-2} \text{s}^{-1}$ . At the end of the experiment, total leaf area was  $70.6 \text{ cm}^2$ , and leaf and stem dry masses were  $0.3908$  and  $0.0491 \text{ g}$ .

*Portulaca cryptopetala*

Net CO<sub>2</sub> exchange (nmol s<sup>-1</sup>)

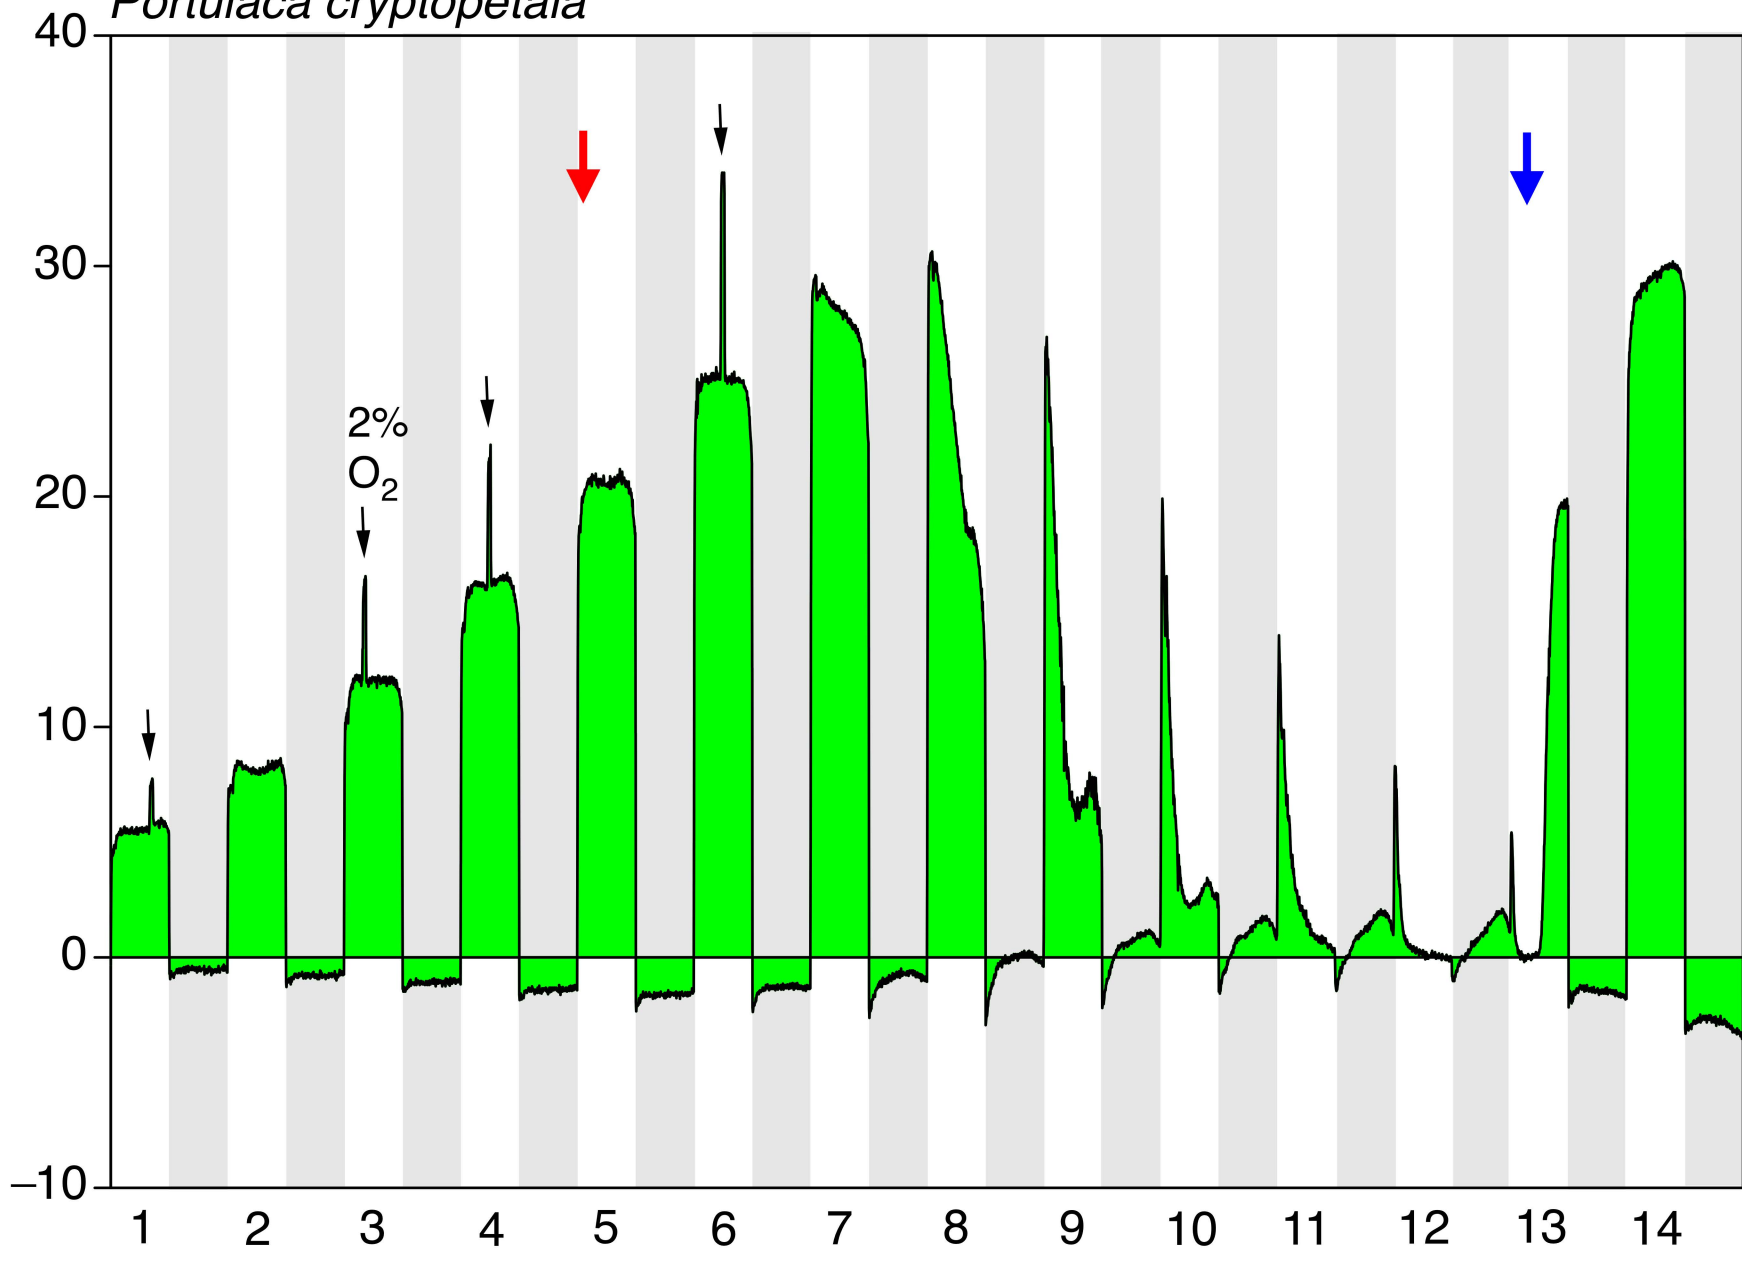

Day

*Portulaca molokiniensis*

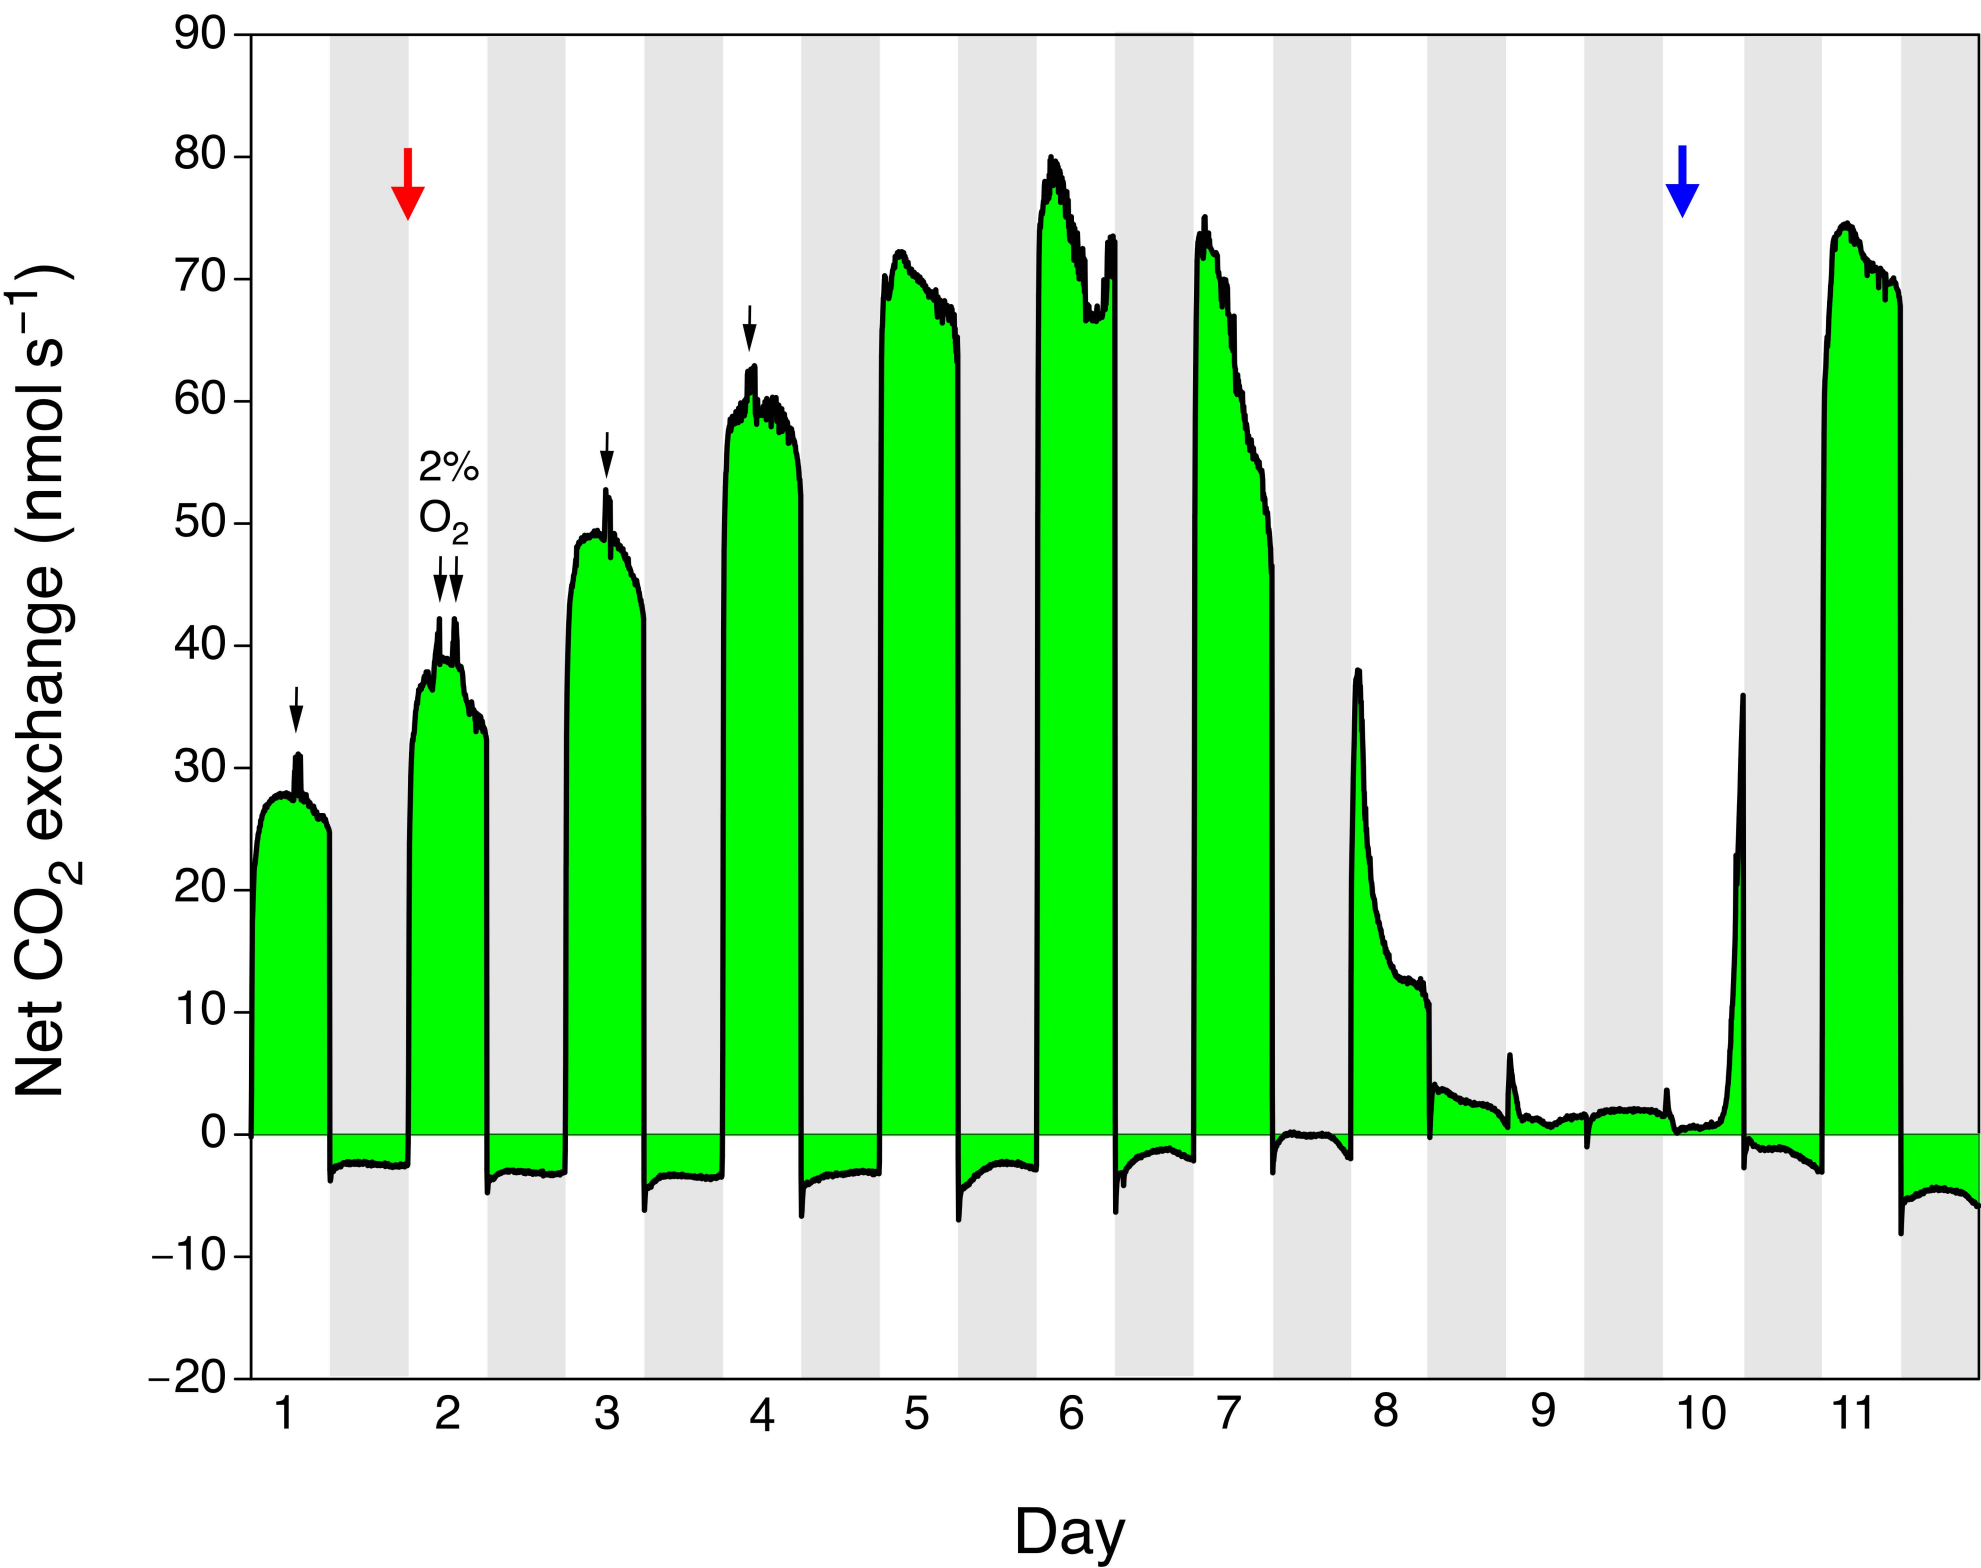

*Portulaca molokiniensis*

Net CO<sub>2</sub> exchange (nmol s<sup>-1</sup>)

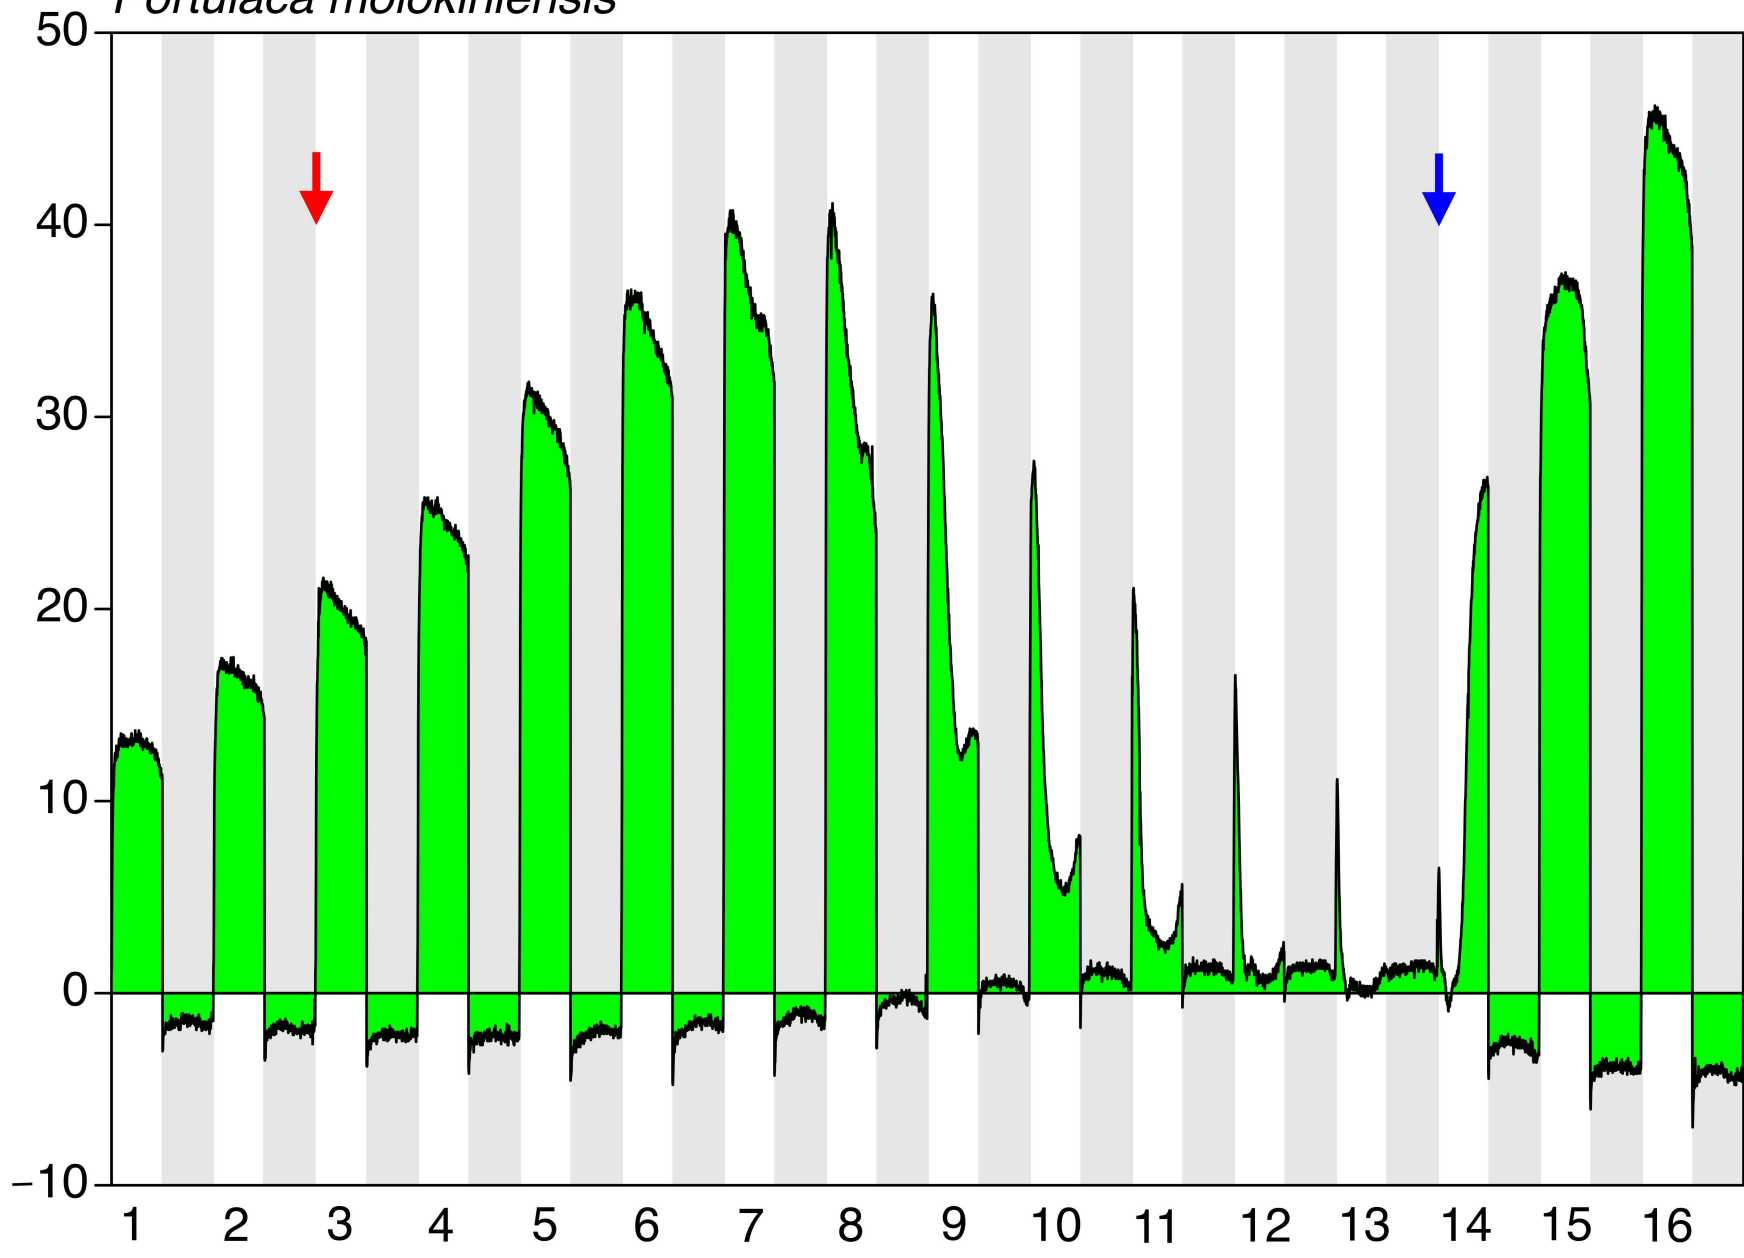

Day

*Portulaca molokiniensis*

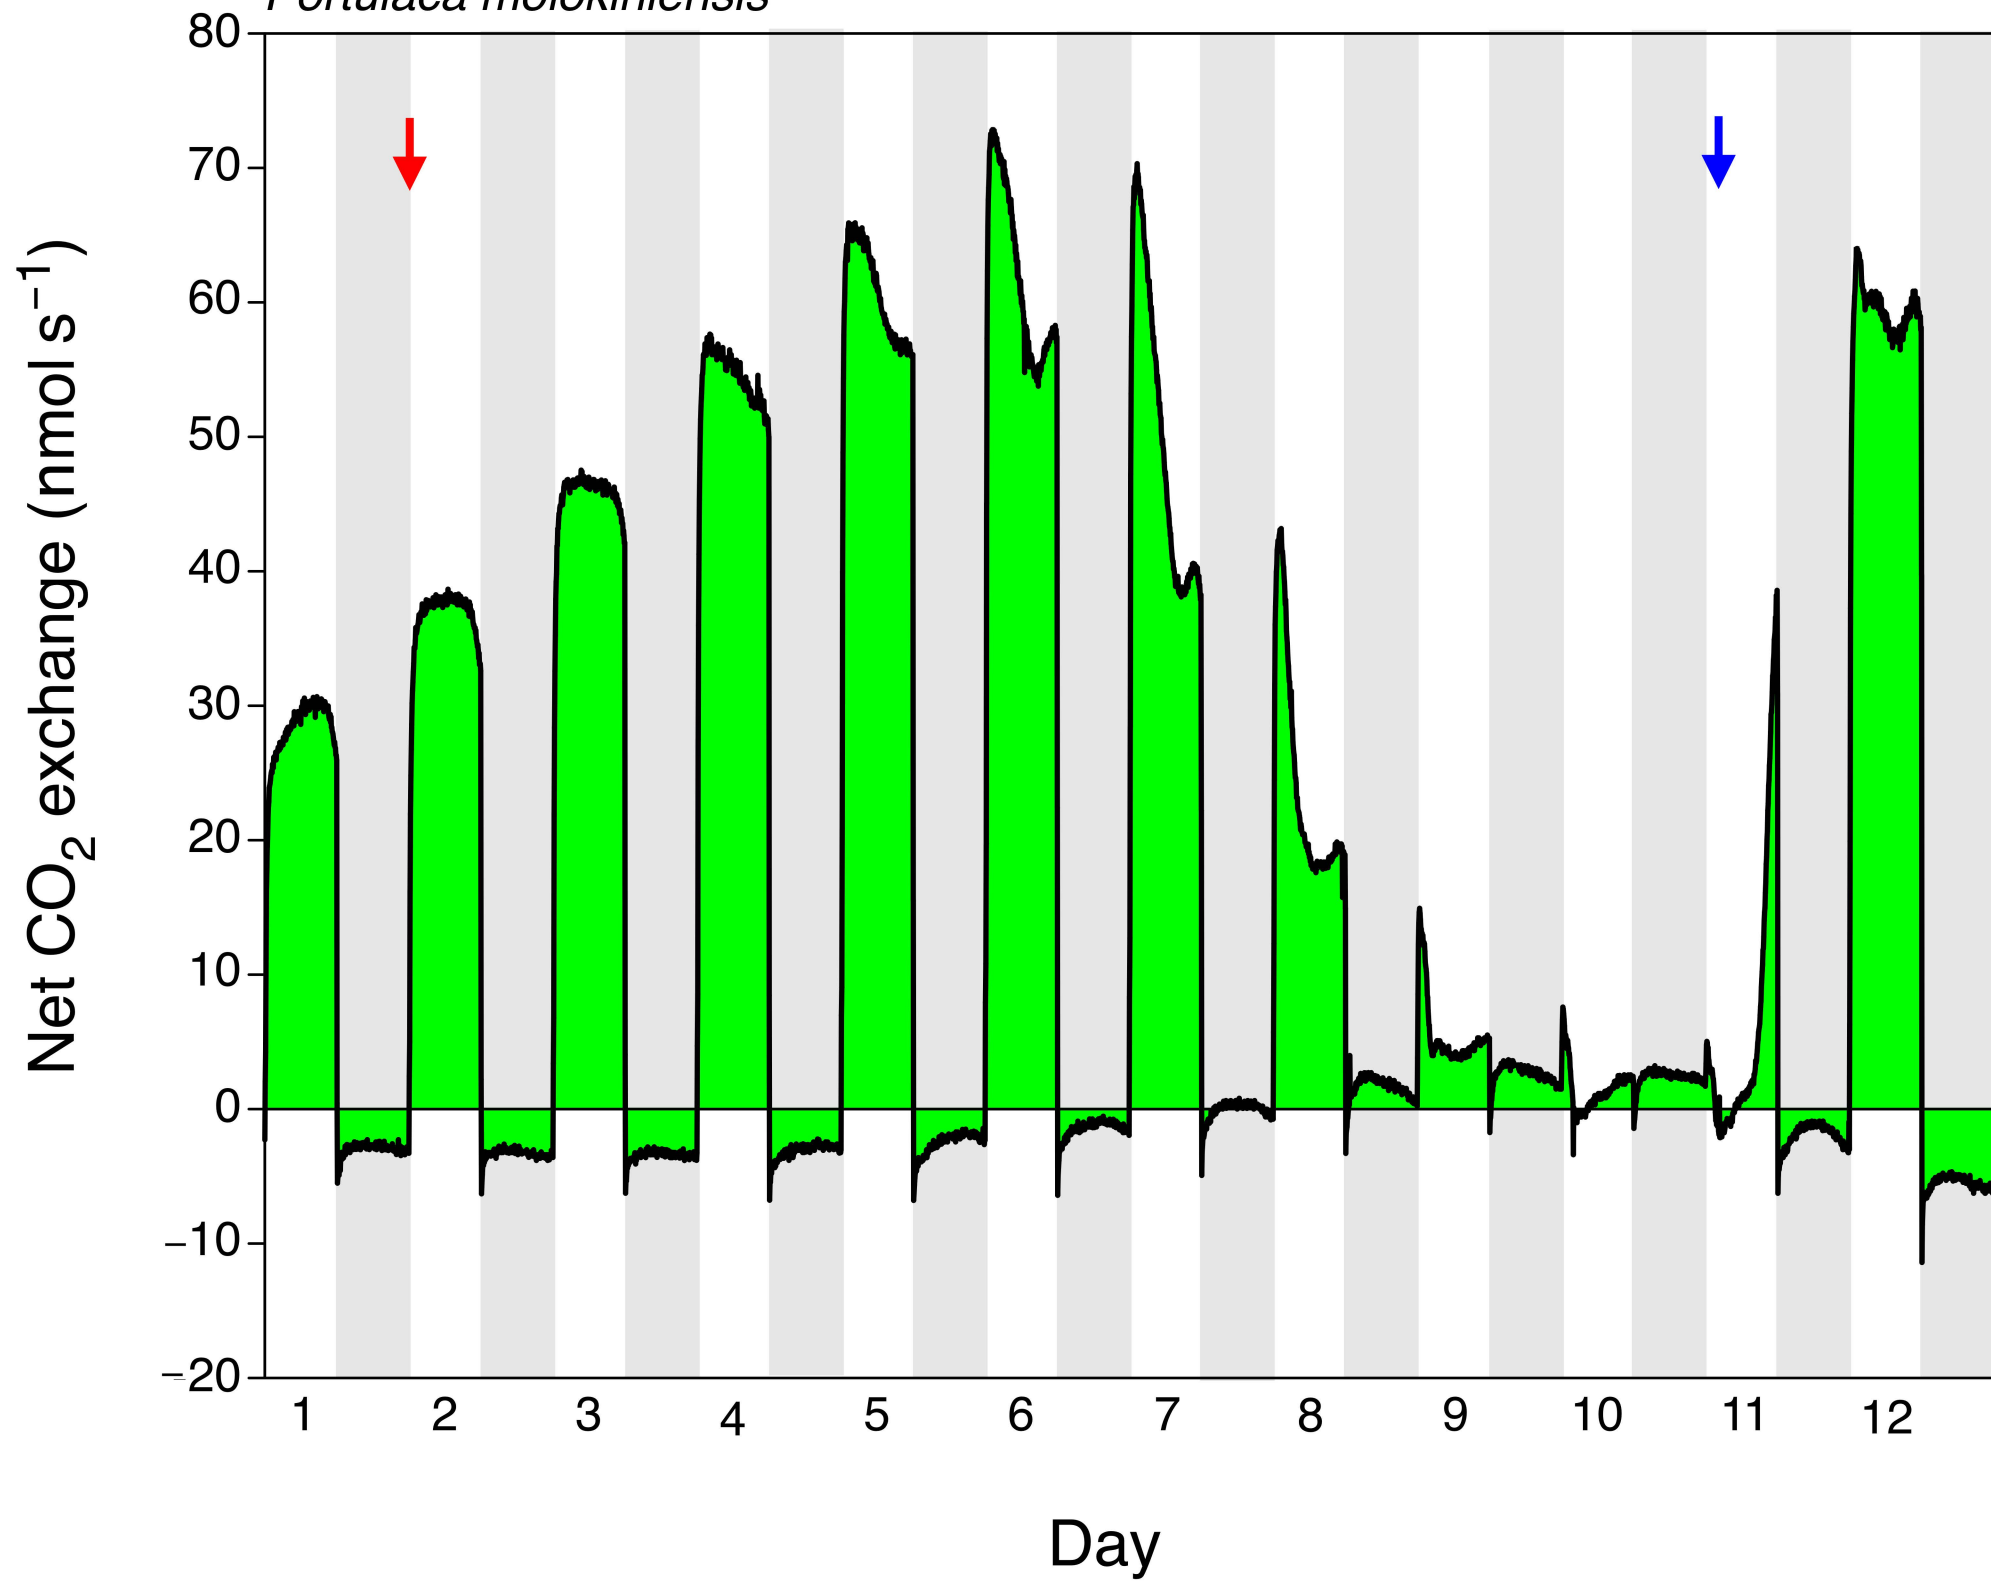

Supplement: erz085_suppl_supplementary_figures_s1-s4.pdf [file erz085_suppl_supplementary_figures_s1-s4.pdf]
